# Supplementary material for: Siderophore biosynthesis coordinately modulated the virulence-associated interactive metabolome of uropathogenic Escherichia coli and human urine
Source: PubMed Central journal article supplement (PMC4831015; doi:10.1038/srep24099), 2016-04-14
Supplement: srep24099-s1.pdf [file srep24099-s1.pdf]

## Supplementary Tables 1-3 and Figures 1-5

### **Siderophore biosynthesis coordinately modulated the virulence-associated interactive metabolome of uropathogenic *Escherichia coli* and human urine**

Qiao Su<sup>1</sup>, Tianbing Guan<sup>1</sup> and Haitao Lv<sup>1, 2\*</sup>

<sup>1</sup>The Laboratory for Functional Omics and Innovative Chinese Medicine, Innovative Drug Research Center, Chongqing University, Chongqing 401331, P.R. China

<sup>2</sup>Shanghai Center for Systems Biomedicine, Key Laboratory of Systems Biomedicine (Ministry of Education), Shanghai Jiao Tong University, Shanghai 200240, China

**\*Corresponding author.**

Haitao Lv Ph.D., Professor. Tel: +86-23-65678464; Fax: +86-23-65678450; Email.:

[haitao.lu@cqu.edu.cn](mailto:haitao.lu@cqu.edu.cn)

**Table S1.** Physiological information for the healthy volunteers

| Urine Type | Morning Urine |
|------------|---------------|
| Age        | 22-25         |
| Male       | 22            |
| Female     | 15            |

**Table S2.** The selected UPEC and associated mutant strains (References 4-6, 20 were listed in text).

| <b>Strain</b>   | <b>Description</b>                                                | <b>Reference or</b> |
|-----------------|-------------------------------------------------------------------|---------------------|
| <b>Urine</b>    | Fresh Urine                                                       | This study          |
| <b>MG1655</b>   | MG1655                                                            | 4-6                 |
| <b>83972 WT</b> | ABU strain                                                        | 20                  |
| <b>83972 A</b>  | 83972 $\Delta iucABCD$ (aerobactin); Kan <sup>r</sup>             | 20                  |
| <b>83972 Y</b>  | 83972 $\Delta ybtS$ (yersiniabactin); Kan <sup>r</sup>            | 20                  |
| <b>83972 S</b>  | 83972 $\Delta iroB$ (salmochelin); Kan <sup>r</sup>               | 20                  |
| <b>83972 ES</b> | 83972 $\Delta entB$ (enterobactin/salmochelin);                   | 20                  |
| <b>83972 AS</b> | 83972 $\Delta iucABCD \Delta iroB$ ; Kan <sup>r</sup>             | 20                  |
| <b>83972 SY</b> | 83972 $\Delta iroB \Delta ybtS$ ; Kan <sup>r</sup>                | 20                  |
| <b>83972 AY</b> | 83972 $\Delta iucABCD \Delta ybtS$ ; Kan <sup>r</sup>             | 20                  |
| <b>83972</b>    | 83972 $\Delta iucABCD \Delta iroB \Delta ybtS$ ; Kan <sup>r</sup> | 20                  |
| <b>83972</b>    | 83972 $\Delta entB \Delta iucABCD$ ; Kan <sup>r</sup>             | 20                  |
| <b>83972</b>    | 83972 $\Delta entB \Delta ybtS$ ; Kan <sup>r</sup>                | 20                  |
| <b>83972</b>    | 83972 $\Delta entB \Delta iucABCD \Delta ybtS$ ; Kan <sup>r</sup> | 20                  |

**Table S3:** Primers used in this study for the deletion of single, double, triple and quadruple siderophores from UPEC strain involving aerobactin, salmochelin, yerisniabactin and enterobactin.

| Primer                            | Sequence (5'-3')                                                       |
|-----------------------------------|------------------------------------------------------------------------|
| <i>iucABCD</i> deletion F primer  | GAGCTGTTTGACTATGACCCTGCCCTCTGAAAAACCAGCCACAGATGTGGGTGTAGGCTGGAGCTGCTTC |
| <i>iucABCD</i> deletion R primer  | GCGGGCGGCATACTGAGATCGAATAAATCACGCCCCAGTACGCGATTAAGCATATGAATATCCTCCTTAG |
| <i>iucABCD</i> screening F primer | TTGATAATGAGAATCATTATTGAC                                               |
| <i>iucABCD</i> screening R primer | GTGGTTTGCGCCATCTCCGC                                                   |
| <i>ybtS</i> deletion F primer     | AGGTTAGAAAACAGTTACTCCTACACCATTAAATAGGGCGCAATGCTCGCGTGTAGGCTGGAGCTGCTTC |
| <i>ybtS</i> deletion R primer     | CCGGCTGCATTTCGGCAAGAGAAGTATGACAAGCGCAATTGATTGATCCGCATATGAATATCCTCCTTAG |
| <i>ybtS</i> screening F primer    | GGCAAATTACCACCACCTCC                                                   |
| <i>ybtS</i> screening R primer    | GTTATCGGTGGCGTTGTTG                                                    |
| <i>entB</i> deletion F primer     | CGGTCGGGAAAGTCGATAAAAAACAATTACGTCAGTGGCTGGCGTCACGCGTGTAGGCTGGAGCTGCTTC |
| <i>entB</i> deletion R primer     | TGAAATCCATTATTTACCTCGCGGAGAGTAGCTTCCACCAGGCGTCGACATATGAATATCCTCCTTAG   |
| <i>entB</i> screening F primer    | CATGGAAGATGAGCTGATGG                                                   |
| <i>entB</i> screening R primer    | GTCGCTCCGTTTCAGCTAAC                                                   |
| <i>iroB</i> deletion F primer     | TCTGTAAAATACGATCCACTGGCCGGATCGTTCCGCAAAAAAGCCAGCACGTGTAGGCTGGAGCTGCTTC |
| <i>iroB</i> deletion R primer     | TGCGTCGACTGCCTGATTTAGATCGTCAAGCGGAGAGGGATTCTCATGCATATGAATATCCTCCTTAG   |
| <i>iroB</i> screening F primer    | TCACAGCCTGTCTTGTGACG                                                   |
| <i>iroB</i> screening R primer    | TGTCCATAACGCTGGTGAAG                                                   |

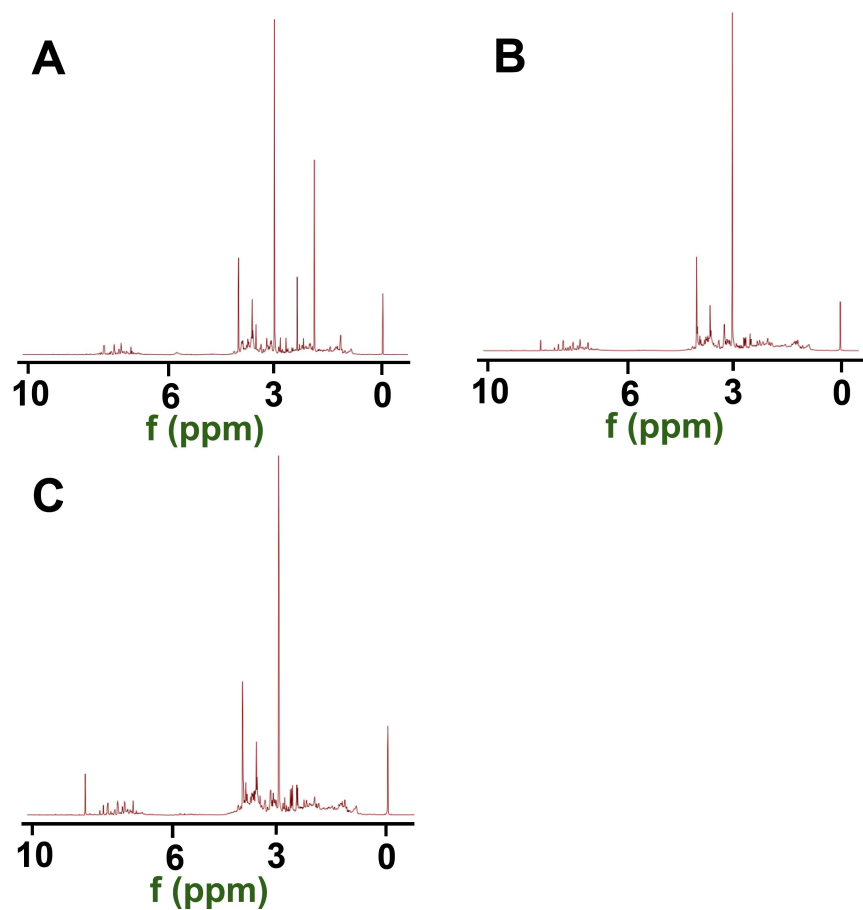

**Figure S1.** Typical NMR based urinary metabolic profiles of (A) pre-culture pooled human urine; (B) post-culture pooled human urine of non-UPEC strain; (C) post-culture pooled human urine of UPEC strain.

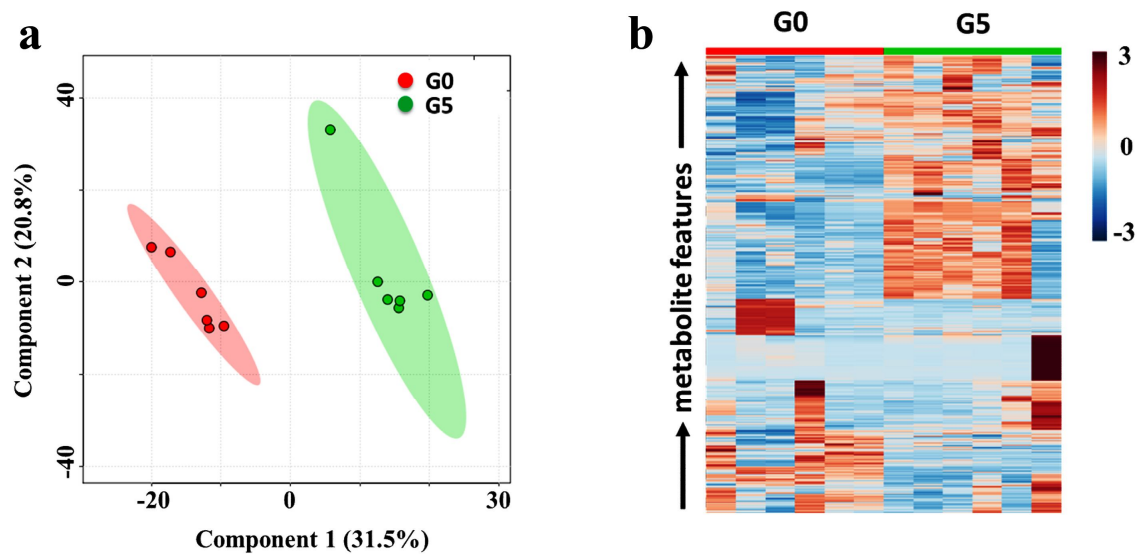

**G0: pooled human urine**  
**G5: post-culture urine of UPEC 83972**

**Figure S2.** The differentiable interactive metabolome was visualized and characterized by the shifted metabolic clusters between post-culture pooled human urine of UPEC strain and pre-culture pooled human urine. A) Score plot resulted from PLS-DA analysis of interactive metabolome amongst the post-culture pooled human urine of UPEC and pre-culture pooled human urine. B) heatmap visualized the relative level of interactive metabolome amongst the post-culture pooled human urine of UPEC and pre-culture pooled human urine.

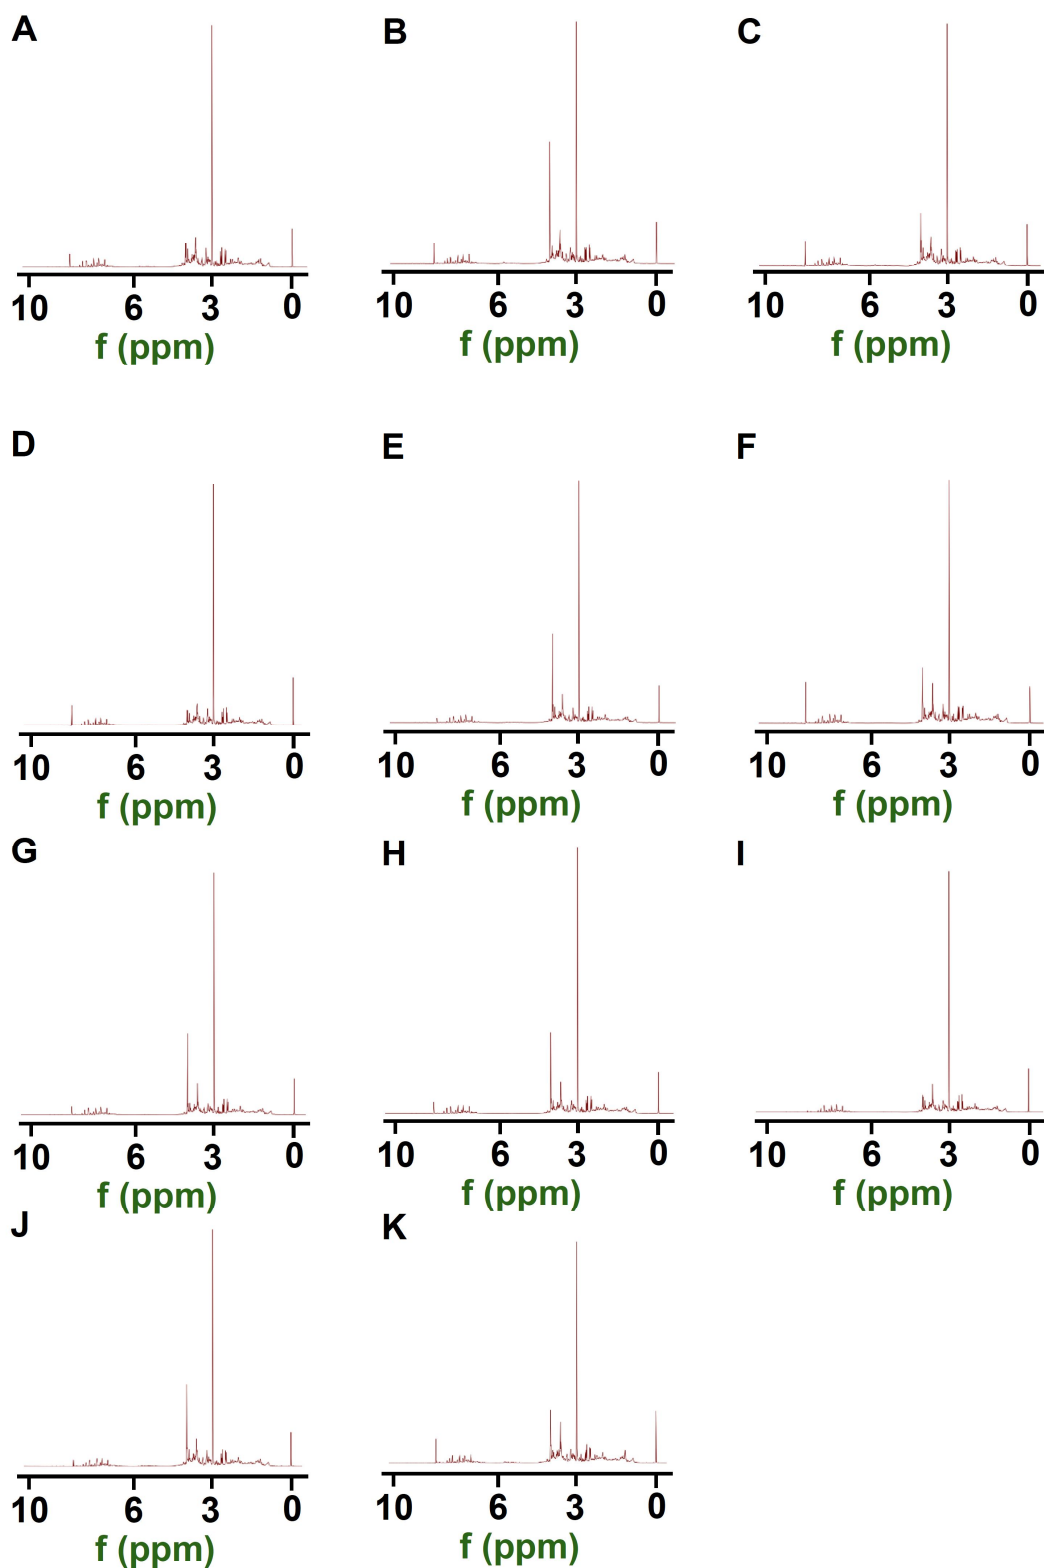

**Figure S3.** Typical NMR based urinary metabolic profiles of (A) post-culture pooled human urine of 83972 $\Delta$ *iucABCD*; (B) post-culture pooled human urine of 83972  $\Delta$ *ybtS* (yersiniabactin); (C) post-culture pooled human urine of 83972  $\Delta$ *iroB* (salmochelins); (D) post-culture pooled human urine of 83972  $\Delta$ *entB*

(enterobactin/salmochelin); (E) post-culture pooled human urine of 83972 *ΔiucABCD ΔiroB*; (F) post-culture pooled human urine of 83972 *ΔiroB ΔybtS*; (G) post-culture pooled human urine of 83972 *ΔiucABCD ΔybtS*; (H) post-culture pooled human urine of 83972 *ΔiucABCD ΔiroB ΔybtS*; (H) post-culture pooled human urine of 83972 *ΔiucABCD ΔiroB ΔybtS*; (I) 83972 *ΔentB ΔiucABCD* (J) post-culture pooled human urine of 83972 *ΔentB ΔybtS*; (K) post-culture pooled human urine of 83972 *ΔentB ΔiucABCD ΔybtS*.



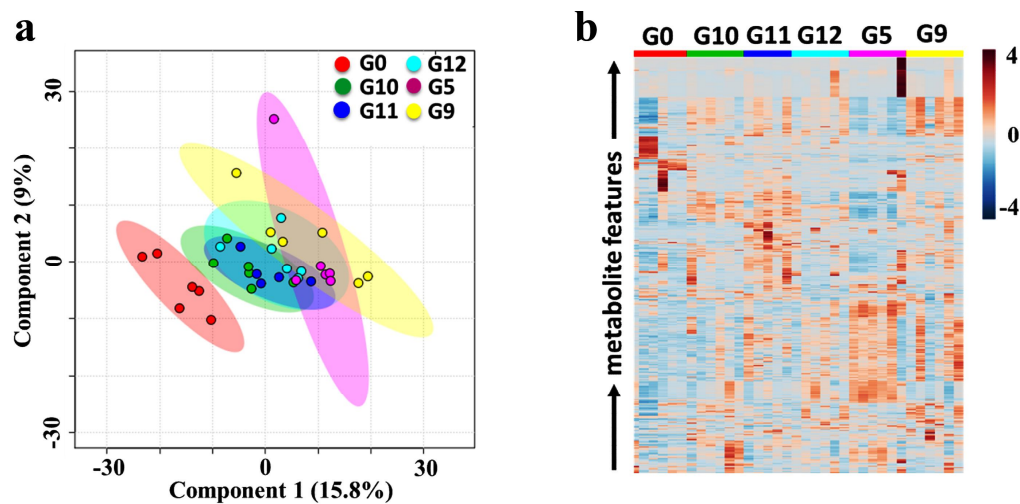

**G0: pooled human urine**

**G10: post-culture urine of UPEC 83972 $\Delta$ *iucABCD/iroB***

**G11: post-culture urine of UPEC 83972 $\Delta$ *iroB/ybtS***

**G12: post-culture urine of UPEC 83972 $\Delta$ *iucABCD/ybtS***

**G5: post-culture urine of UPEC 83972**

**G9: post-culture urine of UPEC 83972 $\Delta$ *entB***

**Figure S4.** The shutdown of double siderophores rendered a certain influence on the interactive metabolome between UPEC and human urine. A. Score plot resulted from PLS-DA analysis of interactive metabolome amongst post-culture human urine of the selected strains and pre-culture pooled human urine. B. Heatmap visualized the relative level of interactive metabolome amongst post-culture human urine of the selected strains and pre-culture pooled human urine.

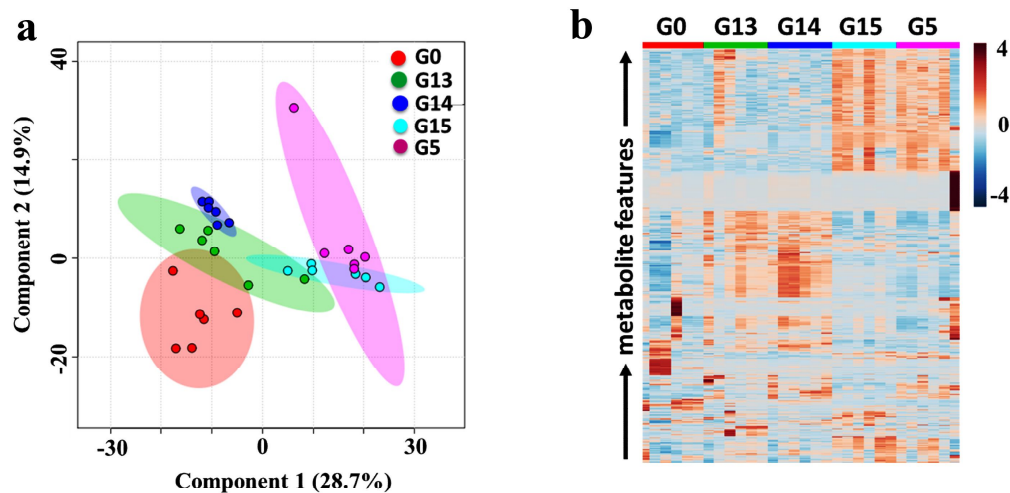

- G0: pooled human urine**
- G13: post-culture urine of UPEC 83972 $\Delta$ *iucABCD*/*iroB*/*ybtS***
- G14: post-culture urine of UPEC 83972 $\Delta$ *entB*/*iucABCD***
- G15: post-culture urine of UPEC 83972 $\Delta$ *entB*/*ybtS***
- G5: post-culture urine of UPEC 83972**

**Figure S5.** The deletion of triple siderophores exerted significantly influence on the interactive metabolome between UPEC and human urine with the tendency statistically restored to control level in pre-culture pooled human urine. A. Score plot resulted from PLS-DA analysis of interactive metabolome amongst post-culture human urine of the selected strains and pre-culture pooled human urine. B. Heatmap visualized the relative level of interactive metabolome amongst post-culture human urine of the selected strains and pre-culture pooled human urine.
